# Supplementary material
Source: HighWire-hosted journal article supplement (https://gut.bmj.com/content/gutjnl-2022-328048)
Supplement: inline-supplementary-material-9 [file inline-supplementary-material-9.pdf]

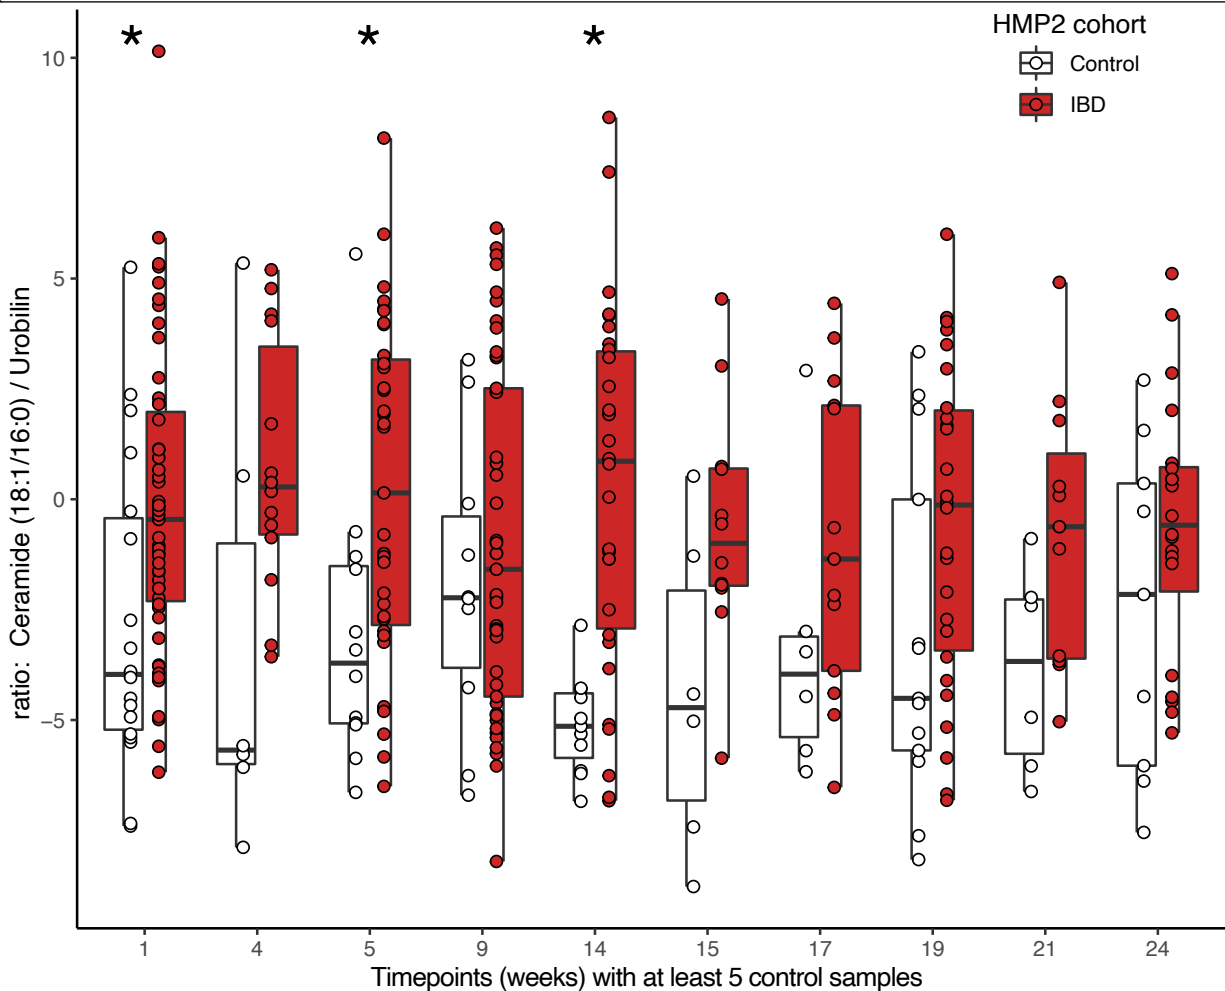

**Suppl. Figure 7. The ratio between a ceramide and urobilin in an independent cohort.** Boxplots showing the log ratio between a ceramide and urobilin in the HMP2 cohort. X-axis represent the time-point in which samples were collected (weeks) and the y-axis the log ratio of the selected metabolites. Samples from participants with IBD (red) consistently show higher levels of this ratio across time-points. Timepoints displayed contain at least 5 non-IBD samples (white) Asterisks indicate significant associations ( $p < 0.05$ , Wilcoxon-test).
